# Supplementary material for: Vertical and seasonal variations in airborne endotoxins in a coastal megacity of North China: insights from 3-hydroxy fatty acids
Source: Copernicus journal article supplement (doi:10.5194/egusphere-2025-2269), 2025-05-28
Supplement: Supplementary file 1 [file egusphere-2025-2269-supplement.pdf]

## ***Supplement of***

# **Vertical and seasonal variations in airborne endotoxins in a coastal megacity of North China: insights from 3-hydroxy fatty acids**

Wenxin Zhang<sup>1</sup>, Wei Hu<sup>1, 2\*</sup>, Mutong Niu<sup>1</sup>, Quanfei Zhu<sup>3</sup>, Na An<sup>3</sup>, Qiang Zhang<sup>1</sup>, Rui Jin<sup>1</sup>, Xiaoli Fu<sup>1</sup>,  
5 Jian Hao<sup>4</sup>, Jianbo Yang<sup>4</sup>, Jingle Liu<sup>5</sup>, Jing Shi<sup>5</sup>, Suqin Han<sup>6</sup>, Junjun Deng<sup>1</sup>, Libin Wu<sup>1</sup>, Yuqi Feng<sup>3</sup>,  
Kimitaka Kawamura<sup>7</sup>, Pingqing Fu<sup>1, 8\*</sup>

<sup>1</sup>Institute of Surface-Earth System Science, School of Earth System Science, Tianjin University, Tianjin 300072, China

<sup>2</sup>Tianjin Bohai Rim Coastal Earth Critical Zone National Observation and Research Station, Tianjin University, Tianjin 300072, China

10 <sup>3</sup>School of Bioengineering and Health, Wuhan Textile University, Wuhan 430072, China

<sup>4</sup>Tianjin Institute of Meteorological Science, Tianjin 300074, China

<sup>5</sup>Tianjin Meteorological Radar Research and Test Centre, Tianjin 300061, China

<sup>6</sup> Tianjin Environmental Meteorological Center, Tianjin 300074, China

<sup>7</sup> Chubu Institute for Advanced Studies, Chubu University, Kasugai, Aichi 487-8501, Japan

15 <sup>8</sup> Tianjin Key Laboratory of Earth Critical Zone Science and Sustainable Development in Bohai Rim, Tianjin University, Tianjin 300072, China

*Correspondence to:* Wei Hu (huwei@tju.edu.cn), Pingqing Fu (fupingqing@tju.edu.cn)

**Text S1 Chemicals and reagents.** The 3-OH-FA standards (C<sub>8</sub>, C<sub>9</sub>, C<sub>10</sub>, C<sub>12</sub>, C<sub>14</sub>, C<sub>16</sub> and C<sub>18</sub>) were purchased from J&K Chemical (Beijing, China), while the rest of the 3-OH-FA standards (C<sub>11</sub>, C<sub>13</sub>, C<sub>15</sub> and C<sub>17</sub>) were purchased from Shanghai SCR-Biotech Co., Ltd. The information on 3-OH-FAs standards and the method validation is presented in Table S1 and Table S2. 2-chloro-1-methylpyridinium iodide (CMPI), triethylamine (TEA), 2-dimethylaminoethylamine (DMED), formic acid (FA), HPLC-grade acetonitrile (ACN), ethyl acetate (EtOAc), dichloromethane (DCM), methyl tert-butyl ether (MTBE), and HPLC-grade methanol (MeOH) were purchased from Aladdin Chemistry Co. Ltd. (Shanghai, China). The isotope-labeling reagent *d*<sub>4</sub>-DMED, the *d*<sub>4</sub>-DMED-labeled saturated fatty acids (C<sub>8</sub> – C<sub>18</sub>), and the *d*<sub>4</sub>-DMED-labeled 3-OH-FA standards (C<sub>8</sub>, C<sub>9</sub>, C<sub>10</sub>, C<sub>12</sub>, C<sub>14</sub>, C<sub>16</sub> and C<sub>18</sub>) were synthesized according to the previous report (Hao et al., 2015).

**Table S1.** The 3-OH-FAs standards list.

| Analytes                    | Molecular Formula                              | CAS No.    | Abbreviation         | M.W. <sup>a</sup> |
|-----------------------------|------------------------------------------------|------------|----------------------|-------------------|
| 3-hydroxyoctanoic acid      | C <sub>8</sub> H <sub>16</sub> O <sub>3</sub>  | 14292-27-4 | 3-OH-C <sub>8</sub>  | 160.2             |
| 3-hydroxynonanoic acid      | C <sub>9</sub> H <sub>18</sub> O <sub>3</sub>  | 40165-87-5 | 3-OH-C <sub>9</sub>  | 174.2             |
| 3-hydroxydecanoic acid      | C <sub>10</sub> H <sub>20</sub> O <sub>3</sub> | 14292-26-3 | 3-OH-C <sub>10</sub> | 188.3             |
| 3-hydroxyundecanoic acid    | C <sub>11</sub> H <sub>22</sub> O <sub>3</sub> | 40165-88-6 | 3-OH-C <sub>11</sub> | 202.3             |
| 3-hydroxydodecanoic acid    | C <sub>12</sub> H <sub>24</sub> O <sub>3</sub> | 1883-13-2  | 3-OH-C <sub>12</sub> | 216.3             |
| 3-hydroxytridecanoic acid   | C <sub>13</sub> H <sub>26</sub> O <sub>3</sub> | 32602-69-0 | 3-OH-C <sub>13</sub> | 230.4             |
| 3-hydroxytetradecanoic acid | C <sub>14</sub> H <sub>28</sub> O <sub>3</sub> | 28715-21-1 | 3-OH-C <sub>14</sub> | 244.4             |
| 3-hydroxypentadecanoic acid | C <sub>15</sub> H <sub>30</sub> O <sub>3</sub> | 32602-70-3 | 3-OH-C <sub>15</sub> | 258.4             |
| 3-hydroxyhexadecanoic acid  | C <sub>16</sub> H <sub>32</sub> O <sub>3</sub> | 928-17-6   | 3-OH-C <sub>16</sub> | 272.4             |
| 2-hydroxyhexadecanoic acid  | C <sub>16</sub> H <sub>32</sub> O <sub>3</sub> | 764-67-0   | 2-OH-C <sub>16</sub> | 272.4             |
| 3-hydroxyheptadecanoic acid | C <sub>17</sub> H <sub>34</sub> O <sub>3</sub> | 40165-89-7 | 3-OH-C <sub>17</sub> | 286.4             |
| 3-hydroxyoctadecanoic acid  | C <sub>18</sub> H <sub>36</sub> O <sub>3</sub> | 45261-96-9 | 3-OH-C <sub>18</sub> | 300.5             |

Note: <sup>a</sup> Molecular weight

**Table S2.** Method validation for target 3-OH-FAs.

| Analytes             | MRM parameter | Retention time (min) | $R^2$  |
|----------------------|---------------|----------------------|--------|
| 3-OH-C <sub>8</sub>  | 231.2→186.2   | 3.19                 | 0.9995 |
| 3-OH-C <sub>9</sub>  | 245.2→200.2   | 4.14                 | 0.9972 |
| 3-OH-C <sub>10</sub> | 259.2→214.2   | 5.20                 | 0.9986 |
| 3-OH-C <sub>11</sub> | 273.2→228.2   | 6.42                 | 0.9901 |
| 3-OH-C <sub>12</sub> | 287.2→242.2   | 7.63                 | 0.9956 |
| 3-OH-C <sub>13</sub> | 301.2→238.2   | 7.65                 | 0.9947 |
| 3-OH-C <sub>14</sub> | 315.2→270.2   | 9.89                 | 0.9958 |
| 3-OH-C <sub>15</sub> | 329.2→284.2   | 8.84                 | 0.9888 |
| 3-OH-C <sub>16</sub> | 343.2→298.2   | 12.06                | 0.9931 |
| 3-OH-C <sub>17</sub> | 357.2→294.2   | 13.18                | 0.9912 |
| 3-OH-C <sub>18</sub> | 371.2→326.2   | 14.10                | 0.9949 |



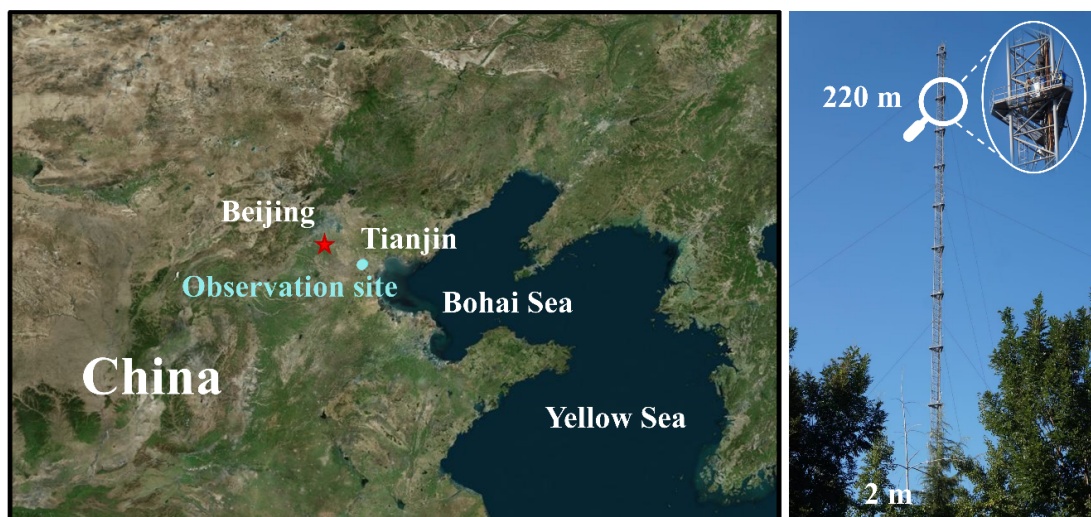

35 **Figure S1.** Geographical location of the observation site at the Tianjin Atmospheric Boundary Layer Observatory of the China Meteorological Administration, located at the southern area of urban Tianjin, China (39°08'N; 117°22'E) and sampler setting on the 255-m meteorological tower. The background map is sourced from MeteoInfo (Wang, 2019), and the tower photograph was taken by Libin Wu.

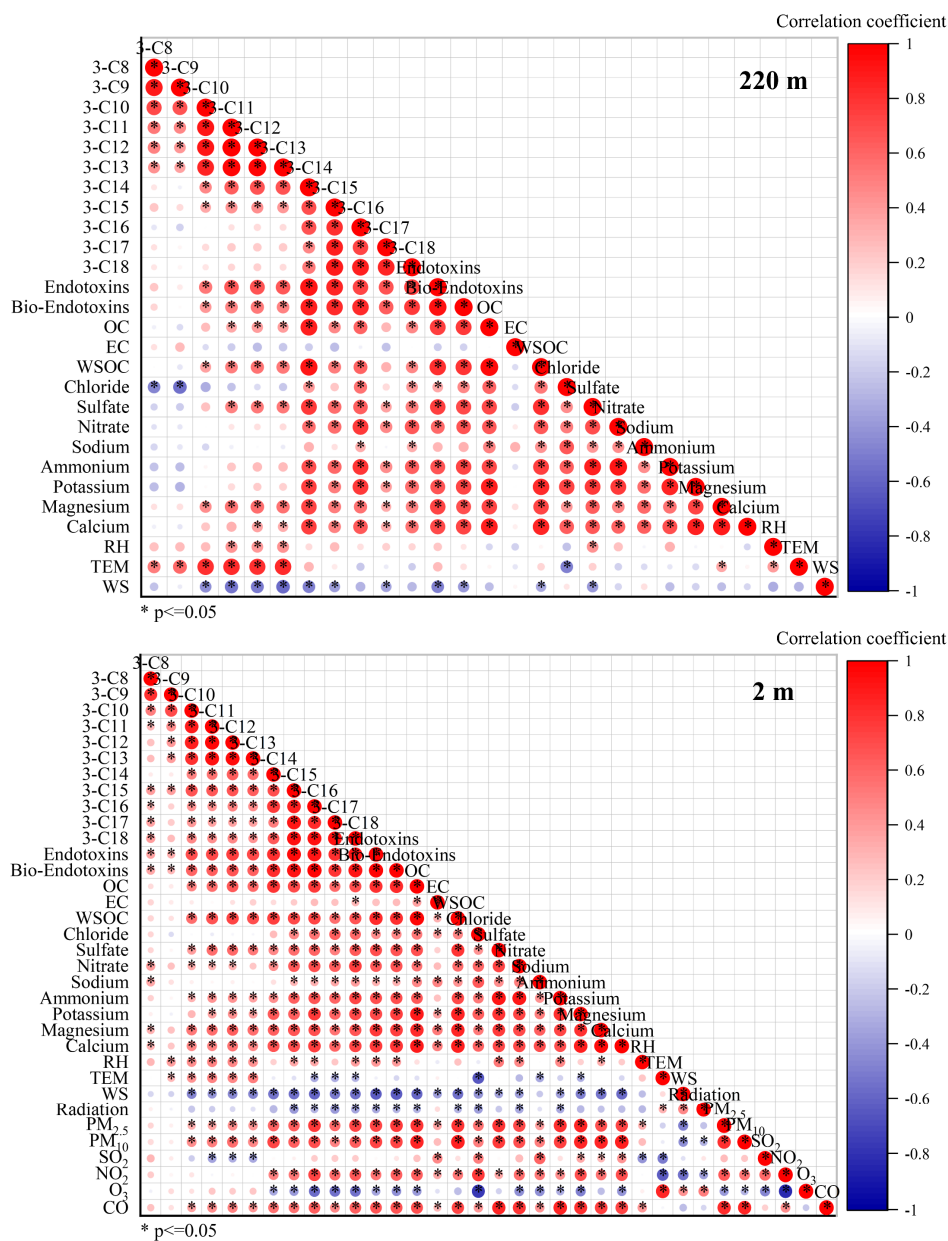

**Figure S2.** Spearman correlation between concentration of 3-OH-FAs, endotoxins and environmental factors (meteorological parameters, carbonaceous fraction, anions and cations, air pollutants) at different heights.

45    **References**

Hao, Y. H., Zhang, Z., Wang, L., Liu, C., Lei, A. W., Yuan, B. F., and Feng, Y. Q.: Stable isotope labeling assisted liquid chromatography-electrospray tandem mass spectrometry for quantitative analysis of endogenous gibberellins, *Talanta*, 144, 341-348, <https://doi.org/10.1016/j.talanta.2015.06.056>, 2015.

Wang, Y. Q.: An Open Source Software Suite for Multi-Dimensional Meteorological Data Computation and Visualisation, *Journal of Open Research Software*, 7, 21, <https://doi.org/10.5334/jors.267>., 2019.

50
